# Supplementary material
Source: PubMed Central journal article supplement (PMC5107154)
Supplement: NIHMS809534-supplement.pdf [file NIHMS809534-supplement.pdf]

## **Appendix**

### **15 items from the Behavior Questionnaire (BQ)**

Thrown something at someone that could hurt.

Twisted someone's arm or hair.

Pushed or shoved someone.

Pulled a knife or gun on someone (but didn't stab them or pull the trigger).

Stabbed or shot at someone.

Punched or hit someone with something that could hurt.

Destroyed something belonging to someone on purpose.

Choked someone.

Slammed someone against a wall.

Beat someone up.

Grabbed someone by the neck, collar, clothes, or some part of their body in anger.

Became so angry with a child that you attacked them with a weapon or with the idea of seriously hurting them.

Became so angry with a child that you attacked them with something really hard or painful like a belt, chair, etc.

Became so angry with a child that you hit them (other than events you just told me about).

Attacked an adult you've lived with with weapon or with the idea of seriously hurting or killing them. This is someone you lived with.
